# Supplementary material for: Clients in Uganda accessing preferred differentiated antiretroviral therapy models achieve higher viral suppression and are less likely to miss appointments: a cross‐sectional analysis
Source: J Int AIDS Soc. 2023 Jul 6;26(Suppl 1):e26122. doi: 10.1002/jia2.26122 (PMC10323312; doi:10.1002/jia2.26122)
Supplement: Supplementary file 1 — Supporting Information S1: DSD client preference tool. Tool used to assess client preference for DART models. [file JIA2-26-e26122-s001.pdf]

## DSD Client Preference Tool for HIV clients in Care

This tool is designed to understand the client preferences for the models of HIV service delivery and community linkages for support services.

## DSD Client Preference Tool for HIV clients in Care

This tool is designed to understand the client preferences for the models of HIV service delivery and community linkages for support services.

## IDENTIFICATION TAGS

DISTRICT: .....

HEALTH FACILITY ..... LEVEL .....

ons: 1) **PART 1 & 2** to be filled by a health worker. 2) **PART 3** to be asked from a client. 3) Enter the response code in the boxes for each column. 4) Each client should be interviewed once. 5) Observe instructions regarding skip patterns for specific questions in the tool

[illegible]
